# Supplementary material for: AMPK‐mediated formation of stress granules is required for dietary restriction‐induced longevity in Caenorhabditis elegans
Source: PubMed Central journal article supplement (PMC7294782; doi:10.1111/acel.13157), 2020-05-20

# Extended figure S3

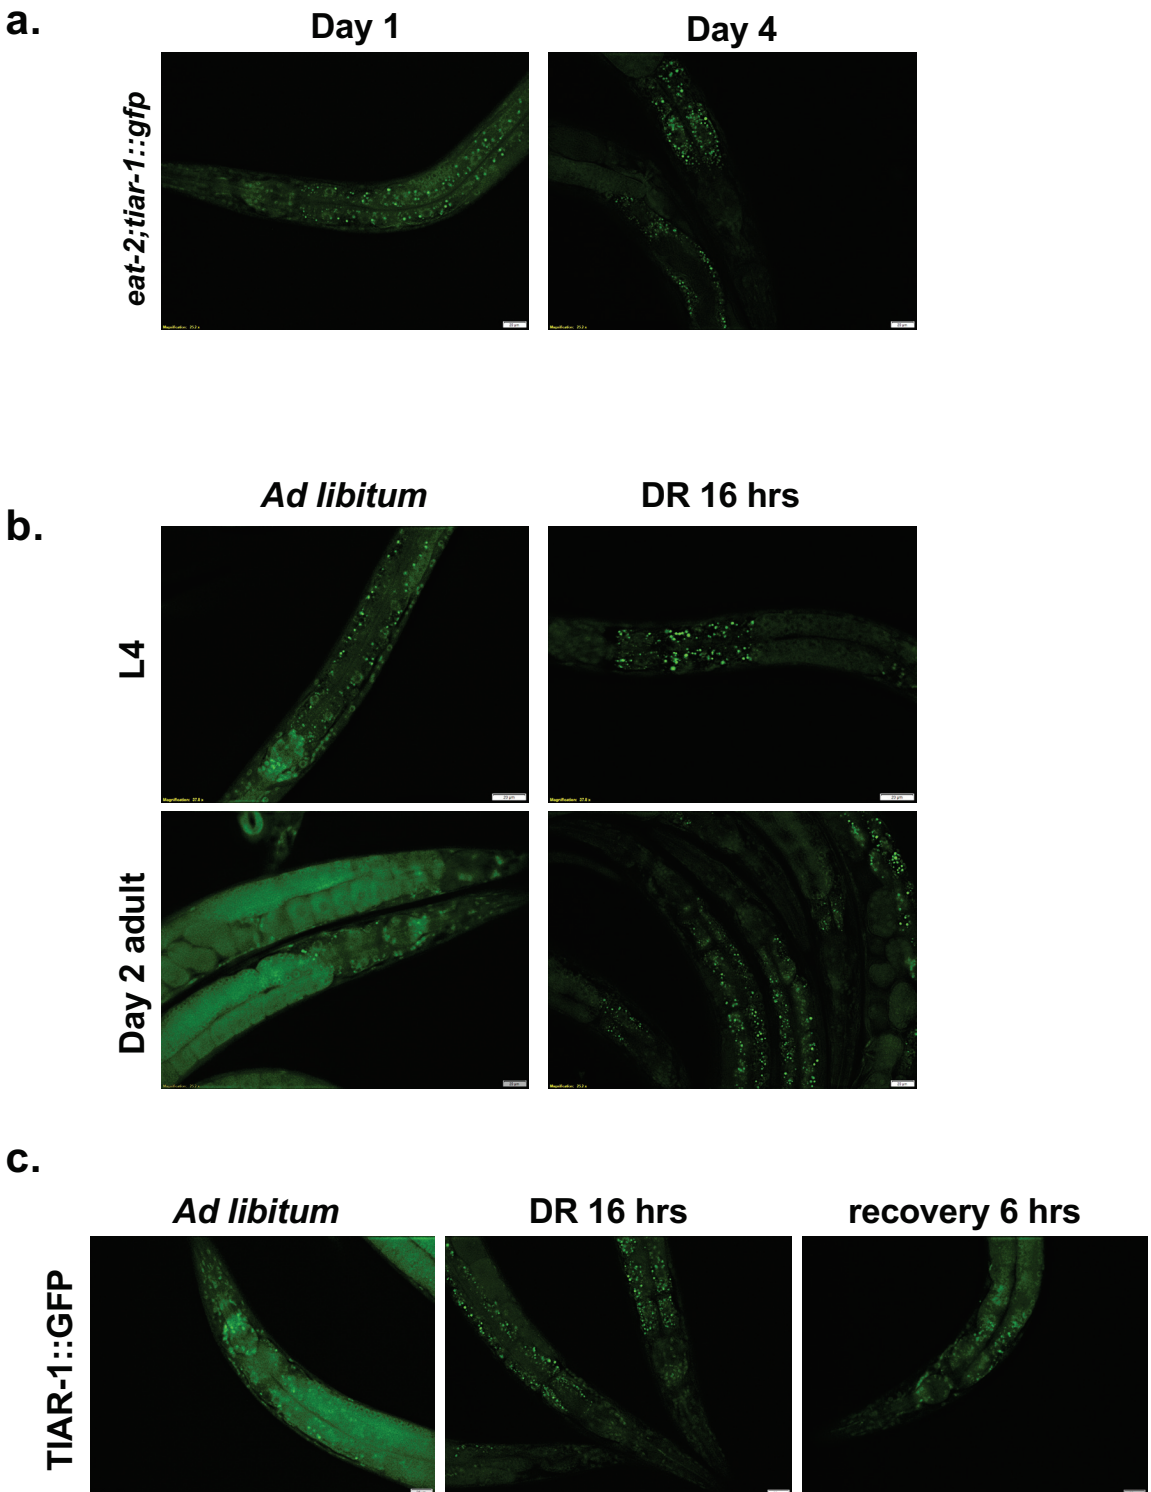

Supplement: ACEL-19-e13157-s003.pdf [file ACEL-19-e13157-s003.pdf]
