# Supplementary material for: AMPK‐mediated formation of stress granules is required for dietary restriction‐induced longevity in Caenorhabditis elegans
Source: PubMed Central journal article supplement (PMC7294782; doi:10.1111/acel.13157), 2020-05-20
Supplement: ACEL-19-e13157-s006.pdf [file ACEL-19-e13157-s006.pdf]

**Extended Data Table 1 |** Statistical data for *C. elegans* lifespan experiments

| strain name     | treatment                | mean(days) | p value                      | 75% | n     | % change (vs N2) |
|-----------------|--------------------------|------------|------------------------------|-----|-------|------------------|
| N2 (WT)         | EV                       | 17.68      |                              | 21  | 79/84 |                  |
| N2 (WT)         | <i>tiar-1</i> RNAi       | 17.01      | 0.4437                       | 21  | 73/84 |                  |
| <i>eat2</i>     | EV                       | 25.88      |                              | 31  | 58/84 | 46.38            |
| <i>eat2</i>     | <i>tiar-1</i> RNAi       | 19.77      | < 0.0001                     | 25  | 62/84 | 11.82            |
| N2 (WT)         | EV                       | 16.35      |                              | 20  | 65/72 |                  |
| N2 (WT)         | <i>tiar-1</i> RNAi       | 15.74      | 0.5573                       | 20  | 66/72 |                  |
| <i>eat2</i>     | EV                       | 24.26      |                              | 30  | 65/72 | 48.37            |
| <i>eat2</i>     | <i>tiar-1</i> RNAi       | 19.8       | 0.0001                       | 22  | 61/72 | 18.35            |
| N2 (WT)         | EV (L4)                  | 19.75      |                              | 22  | 59/71 |                  |
| N2 (WT)         | <i>tiar-1</i> RNAi (L4)  | 19.77      | 0.9906                       | 22  | 50/71 |                  |
| <i>eat2</i>     | EV (L4)                  | 23.84      |                              | 28  | 51/71 | 23.44            |
| <i>eat2</i>     | <i>tiar-1</i> RNAi (L4)  | 19.03      | 0.0004                       | 22  | 54/72 | -5.32            |
| N2 (WT)         | EV (L4)                  | 18.25      |                              | 21  | 55/63 |                  |
| N2 (WT)         | <i>tiar-1</i> RNAi (L4)  | 17.69      | 0.4265                       | 21  | 61/73 |                  |
| <i>eat2</i>     | EV (L4)                  | 23.39      |                              | 27  | 56/82 | 28.16            |
| <i>eat2</i>     | <i>tiar-1</i> RNAi (L4)  | 21.08      | 0.0138                       | 25  | 78/83 | 15.51            |
| N2 (WT)         | EV (L4)                  | 19.27      |                              | 22  | 78/84 |                  |
| N2 (WT)         | <i>gtbp-1</i> RNAi (L4)  | 18.8       | 0.6443                       | 22  | 75/84 |                  |
| <i>eat2</i>     | EV (L4)                  | 24.38      |                              | 30  | 71/84 | 26.52            |
| <i>eat2</i>     | <i>gtbp-1</i> RNAi (L4)  | 20.53      | 0.0008                       | 26  | 79/84 | 6.54             |
| N2 (WT)         | EV (L4)                  | 19.75      |                              | 24  | 59/71 |                  |
| N2 (WT)         | <i>gtbp-1</i> RNAi (L4)  | 20.55      | 0.4373                       | 24  | 65/72 |                  |
| <i>eat2</i>     | EV (L4)                  | 24.38      |                              | 30  | 48/70 | 23.44            |
| <i>eat2</i>     | <i>gtbp-1</i> RNAi (L4)  | 20.62      | 0.0236                       | 26  | 45/72 | 4.41             |
| N2 (WT)         | EV (L4)                  | 20.78      |                              | 24  | 56/84 |                  |
| N2 (WT)         | <i>aak-1</i> RNAi (L4)   | 18.99      | 0.052                        | 21  | 65/80 |                  |
| <i>eat-2</i>    | EV (L4)                  | 25.78      |                              | 32  | 52/84 | 24.06            |
| <i>eat-2</i>    | <i>aak-1</i> RNAi (L4)   | 21.84      | 0.0005                       | 26  | 64/82 | 5.1              |
| N2 (WT)         | EV (L4)                  | 21.28      |                              | 24  | 50/71 |                  |
| <i>eat-2</i>    | EV (L4)                  | 27.43      |                              | 33  | 56/75 | 28.9             |
| <i>eat-2</i>    | <i>aak-1</i> RNAi (L4)   | 24.32      | 0.0028                       | 29  | 56/75 | 14.29            |
| N2 (WT)         | EV (L4)                  | 21.18      |                              | 24  | 50/71 |                  |
| <i>eat-2</i>    | EV (L4)                  | 27.36      | < 0.0001 (vs N2)             | 33  | 54/73 | 29.17            |
| <i>eat-2</i>    | <i>aak-1</i> RNAi (eggs) | 26.58      | 0.5169 (vs <i>eat-2</i> EV)  | 33  | 49/74 | 25.5             |
| <i>eat-2</i>    | <i>aak-1</i> RNAi (L4)   | 24.26      | 0.0037 (vs <i>eat-2</i> EV)  | 29  | 56/75 | 14.54            |
| N2 (WT)         | EV                       | 15.76      |                              | 19  | 59/72 |                  |
| <i>aak-1 OE</i> | EV                       | 18.9       | 0.0005                       | 23  | 64/72 | 19.92            |
| N2 (WT)         | EV                       | 18.33      |                              | 23  | 72/85 |                  |
| N2 (WT)         | <i>tiar-1</i> RNAi       | 17.87      | 0.7876                       | 21  | 72/84 |                  |
| <i>aak-1 OE</i> | EV                       | 24.71      | < 0.0001 (vs N2)             | 28  | 76/85 | 34.8             |
| <i>aak-1 OE</i> | <i>tiar-1</i> RNAi       | 20.88      | 0.0001 (vs <i>aak-1 OE</i> ) | 25  | 78/83 | 13.91            |
| N2 (WT)         | EV                       | 16.05      |                              | 21  | 64/84 |                  |
| N2 (WT)         | <i>efk-1</i> RNAi (L4)   | 16.2       | 0.8307                       | 21  | 71/84 |                  |
| <i>aak-1 OE</i> | EV                       | 21.28      | < 0.0001 (vs N2)             | 25  | 68/72 | 32.59            |
| <i>aak-1 OE</i> | <i>efk-1</i> RNAi (L4)   | 19.09      | 0.0034                       | 23  | 70/72 | 18.94            |
| N2 (WT)         | EV                       | 18.25      |                              | 21  | 55/63 |                  |
| N2 (WT)         | <i>efk-1</i> RNAi (L4)   | 17.99      | 0.8715                       | 21  | 51/72 |                  |
| <i>aak-1 OE</i> | EV                       | 24.58      | < 0.0001 (vs N2)             | 29  | 67/72 | 34.68            |
| <i>aak-1 OE</i> | <i>efk-1</i> RNAi (L4)   | 23.32      | 0.0322                       | 27  | 63/71 | 27.78            |
| N2 (WT)         | EV (L4)                  | 19.19      |                              | 21  | 77/84 |                  |
| N2 (WT)         | <i>efk-1</i> RNAi (L4)   | 20.38      | 0.523                        | 21  | 66/84 |                  |
| <i>eat2</i>     | EV (L4)                  | 24.81      |                              | 29  | 74/84 | 29.29            |
| <i>eat2</i>     | <i>efk-1-1</i> RNAi (L4) | 23.39      | 0.0336                       | 27  | 71/84 | 21.89            |
| N2 (WT)         | EV (L4)                  | 19.75      |                              | 24  | 59/71 |                  |
| N2 (WT)         | <i>efk-1</i> RNAi (L4)   | 20.63      | 0.6443                       | 24  | 75/84 |                  |
| <i>eat2</i>     | EV (L4)                  | 24.38      |                              | 30  | 48/70 | 23.44            |
| <i>eat2</i>     | <i>efk-1-1</i> RNAi (L4) | 18.85      | 0.0009                       | 26  | 53/72 | -4.54            |
| N2 (WT)         | EV                       | 20.72      |                              | 24  | 69/84 |                  |
| N2 (WT)         | <i>eef-2</i> RNAi        | 22.73      | 0.0035                       | 26  | 82/94 | 9.65             |
| N2 (WT)         | EV                       | 18.59      |                              | 22  | 62/72 |                  |
| N2 (WT)         | <i>eef-2</i> RNAi        | 20.34      | 0.0213                       | 24  | 62/66 | 9.41             |
| <i>eat2</i>     | EV                       | 23.05      |                              | 31  | 68/90 |                  |
| <i>eat2</i>     | <i>eef-2</i> RNAi        | 21.83      | 0.275                        | 25  | 89/96 |                  |
| N2 (WT)         | <i>ad libitum</i>        | 16.93      |                              | 20  | 65/80 |                  |
| N2 (WT)         | DR                       | 23.54      | < 0.0001                     | 28  | 61/80 | 39.04            |
| <i>eef-2 OE</i> | <i>ad libitum</i>        | 16.46      |                              | 18  | 62/80 |                  |
| <i>eef-2 OE</i> | DR                       | 17.42      | 0.3934                       | 22  | 58/80 | 5.83 (vs AL)     |
| N2 (WT)         | <i>ad libitum</i>        | 18.57      |                              | 22  | 69/80 |                  |
| N2 (WT)         | DR                       | 27.4       | < 0.0001                     | 36  | 59/80 | 47.55            |
| <i>eef-2 OE</i> | <i>ad libitum</i>        | 15.31      |                              | 18  | 72/84 |                  |
| <i>eef-2 OE</i> | DR                       | 20.03      | 0.0028                       | 25  | 62/79 | 30.83 (vs AL)    |
| N2 (WT)         | EV                       | 19.65      |                              | 23  | 78/84 |                  |
| N2 (WT)         | <i>tiar-1</i> RNAi       | 16.96      | 0.0009                       | 19  | 74/84 |                  |
| <i>daf-2</i>    | EV                       | 49.25      |                              | 67  | 43/84 | 150.64           |
| <i>daf-2</i>    | <i>tiar-1</i> RNAi       | 50.57      | 0.6081                       | 63  | 57/84 | 157.35           |
| N2 (WT)         | EV                       | 21.32      |                              | 23  | 89/96 |                  |
| N2 (WT)         | <i>tiar-1</i> RNAi       | 18.76      | 0.0012                       | 19  | 85/96 |                  |
| <i>daf-2</i>    | EV                       | 53.94      |                              | 67  | 60/96 | 153              |
| <i>daf-2</i>    | <i>tiar-1</i> RNAi       | 45.54      | 0.0789                       | 63  | 59/96 | 113.6            |
| N2 (WT)         | EV                       | 16.68      |                              | 20  | 85/96 |                  |
| N2 (WT)         | <i>gtbp-1</i> RNAi       | 16.69      | 0.8946                       | 20  | 90/96 |                  |
| <i>daf-2</i>    | EV                       | 49.41      |                              | 73  | 66/96 | 196.22           |
| <i>daf-2</i>    | <i>gtbp-1</i> RNAi       | 47.1       | 0.5291                       | 65  | 59/96 | 182.37           |
| N2 (WT)         | EV                       | 18.04      |                              | 21  | 93/96 |                  |
| N2 (WT)         | <i>gtbp-1</i> RNAi       | 17.66      | 0.6315                       | 21  | 88/96 |                  |
| <i>daf-2</i>    | EV                       | 50.52      |                              | 68  | 71/96 | 180.04           |
| <i>daf-2</i>    | <i>gtbp-1</i> RNAi       | 50.82      | 0.8031                       | 66  | 67/96 | 181.71           |
