# Supplementary material for: AMPK‐mediated formation of stress granules is required for dietary restriction‐induced longevity in Caenorhabditis elegans
Source: PubMed Central journal article supplement (PMC7294782; doi:10.1111/acel.13157), 2020-05-20
Supplement: ACEL-19-e13157-s007.pdf [file ACEL-19-e13157-s007.pdf]

**Extended Data Table 2** | Statistical data for *C. elegans* oxidative stress experiments

| <b>strain</b>                      | <b>treatment</b> | <b>mean(hours)</b> | <b>p value</b>   | <b>75%</b> | <b>n</b> |
|------------------------------------|------------------|--------------------|------------------|------------|----------|
| N2 (WT)                            | 200 mM paraquat  | 7.5                |                  | 9          | 72       |
| <i>gtbp-1(ax2029)</i>              | 200 mM paraquat  | 5.8                | < 0.0001 (vs N2) | 7          | 72       |
| <i>gtbp-1(ax2055[gtbp-1::gfp])</i> | 200 mM paraquat  | 7.5                | 0.9877 (vs N2)   | 9          | 72       |
| N2 (WT)                            | 200 mM paraquat  | 8.5                |                  | 10         | 72       |
| <i>gtbp-1(ax2029)</i>              | 200 mM paraquat  | 6.8                | 0.0033 (vs N2)   | 9          | 72       |
| <i>gtbp-1(ax2055[gtbp-1::gfp])</i> | 200 mM paraquat  | 8.2                | 0.9877 (vs N2)   | 10         | 72       |
